# Supplementary material for: Preparation of tungstophosphoric acid/cerium-doped NH2-UiO-66 Z-scheme photocatalyst: a new candidate for green photo-oxidation of dibenzothiophene and quinoline using molecular oxygen as the oxidant
Source: Royal Society of Chemistry journal article supplement (doi:10.1039/d1nj00328c), 2021-01-01
Supplement: d1nj00328c1.pdf [file d1nj00328c1.pdf]

## Preparation of tungstophosphoric acid/cerium-doped UiO-66 Z-scheme photocatalyst: A new candidate for green photo-oxidation of dibenzothiophene and quinoline using molecular oxygen as oxidant

Hanieh Fakhri<sup>a,b</sup>, Ali Esrafil<sup>a,b</sup>, Mahdi Farzadkia<sup>a,b,\*</sup>, Rabah Boukherroub<sup>c</sup>, Varsha Srivastava<sup>d</sup>, Mika Sillanpää<sup>e,f,g</sup>

<sup>a</sup> Research Center for Environmental Health Technology, Iran University of Medical Sciences, Tehran, Iran

<sup>b</sup> Department of Environmental Health Engineering, School of Public Health, Iran University of Medical Science, P.O. Box. 14496-14535, Tehran, Iran

<sup>c</sup> Univ. Lille, CNRS, Centrale Lille, Univ. Polytechnique Hauts-de-France, UMR 8520 – IEMN, F-59000 Lille, France

<sup>d</sup> Department of Chemistry, University of Jyväskylä, P.O. Box 35, FI-40014 Jyväskylä, Finland

<sup>e</sup> Institute of Research and Development, Duy Tan University, Da Nang 550000, Vietnam

<sup>f</sup> Faculty of Environment and Chemical Engineering, Duy Tan University, Da Nang 550000, Vietnam.

<sup>g</sup> School of Civil Engineering and Surveying, Faculty of Health, Engineering and Sciences, University of Southern Queensland, West Street, Toowoomba, 4350 QLD, Australia

### Characterization

X-ray diffraction (XRD) patterns were recorded on Philips X-pert X-ray diffractometer using Cu K $\alpha$  radiation (wavelength,  $\lambda = 1.5418 \text{ \AA}$ ). Scanning electron microscopy (SEM) and energy-dispersive X-ray (EDX) spectroscopy were conducted on Philips XL-300 instrument. Transmission electron microscopy (Philips cm 30) was used to assay morphological features. Shimadzu-8400S spectrometer was used to acquire Fourier-transform infrared (FT-IR) spectra of the synthesized samples. A gas chromatograph (GC) coupled with a flame ionization detector (GC-FID (HP5890, Agilent)) was used to monitor the concentration of pollutant model. The percentage of Ce was determined by inductively coupled plasma mass spectrometry (ICP-MS) (Varian vista PRO instrument) analysis. The photoluminescence (PL) spectra were recorded using A PELS-55 Luminescence/Fluorescence spectrophotometer.

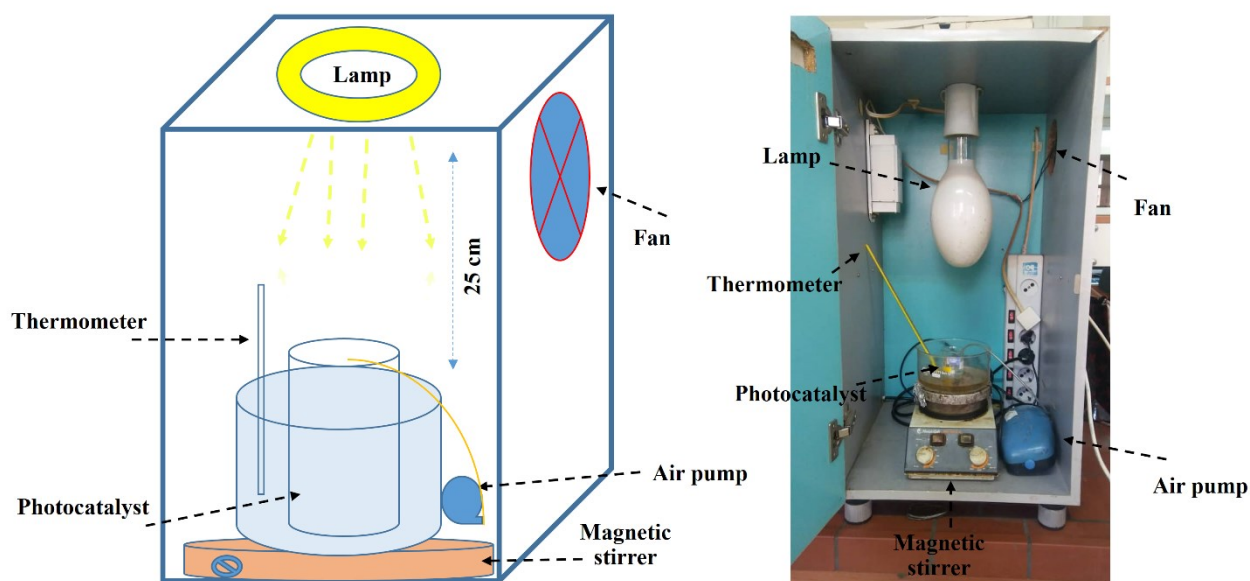

Fig. S1. Scheme of the photocatalytic system (a) and real picture of the photocatalytic box (b)

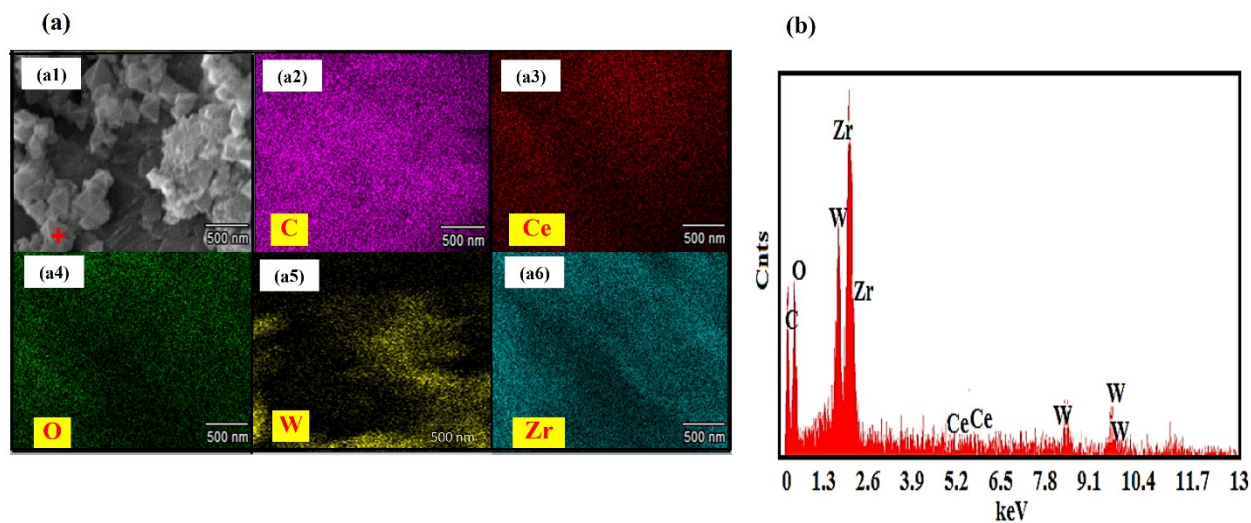

Fig. S2. (a) Mapping analysis of PW<sub>12</sub>/Ce-NUIO-66, (a1) Original image of the region where the mapping was performed, element mapping images of (a2) carbon, (a3) cerium, (a4) oxygen, (a5) tungsten and (a6) zirconium; (b) EDAX spectrum of PW<sub>12</sub>/Ce-NUIO-66.

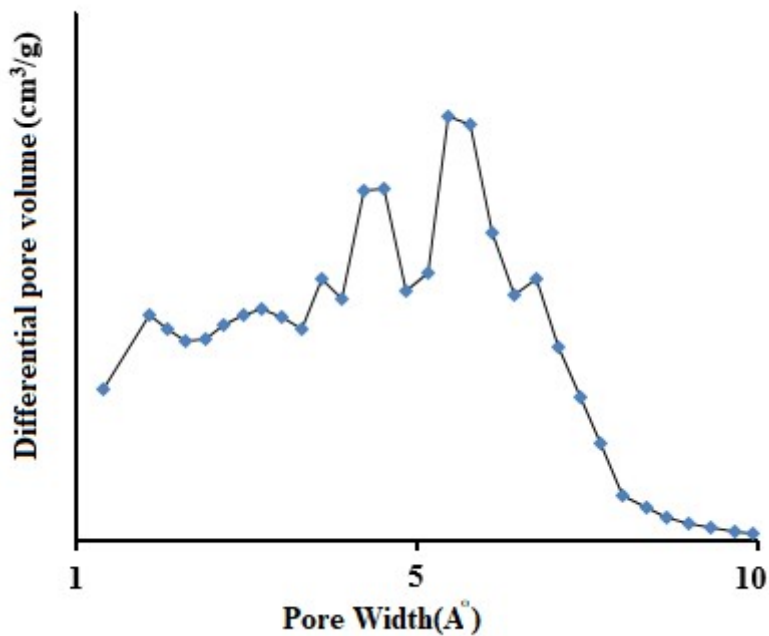

Fig. S3. Density functional theory pore size distribution profiles of 30PW<sub>12</sub>/Ce-NUIO-66.

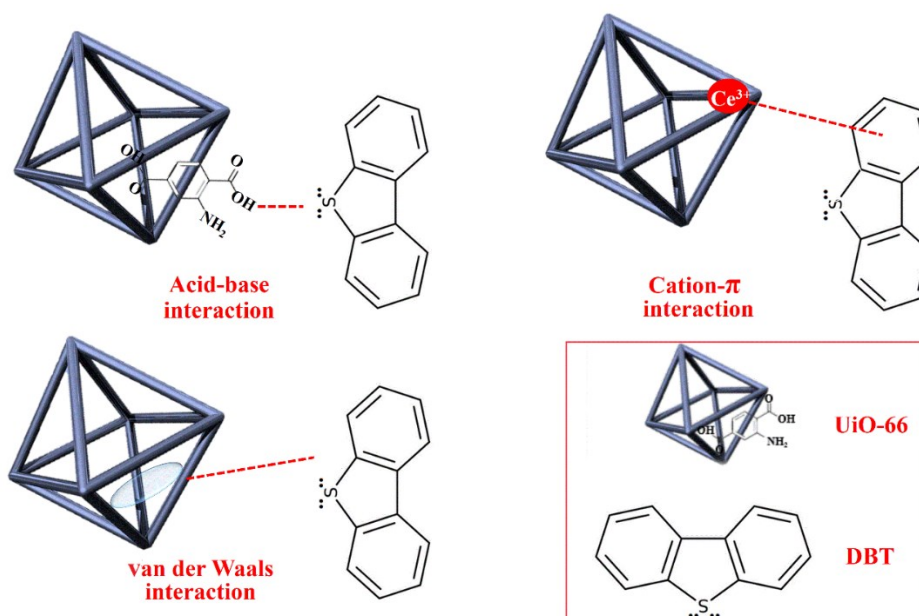

Fig. S4. The proposed interactions involved for DBT adsorption.

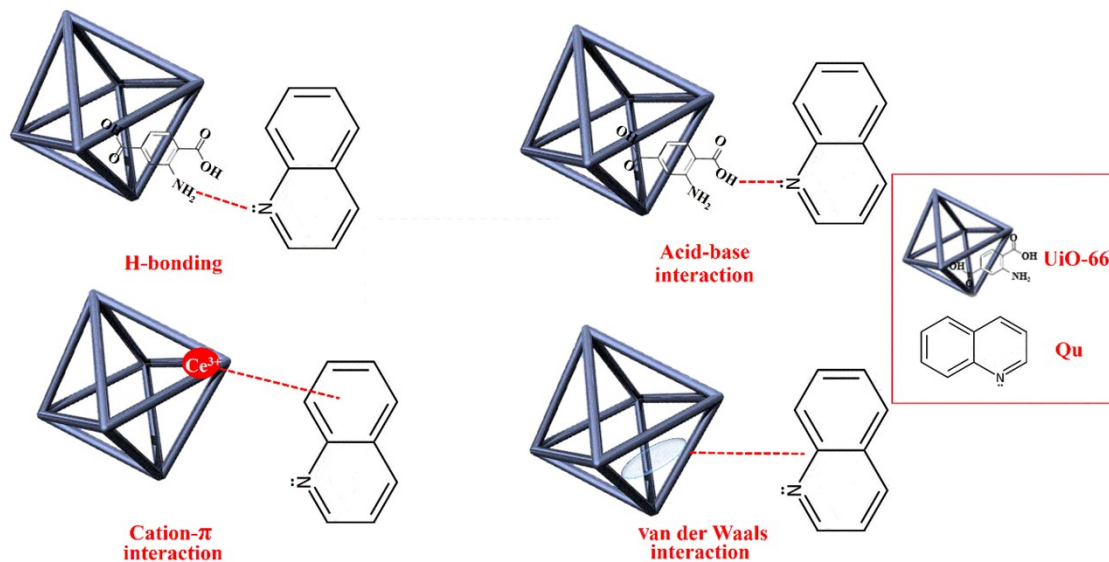

Fig. S5. The proposed interactions involved for Qu adsorption.

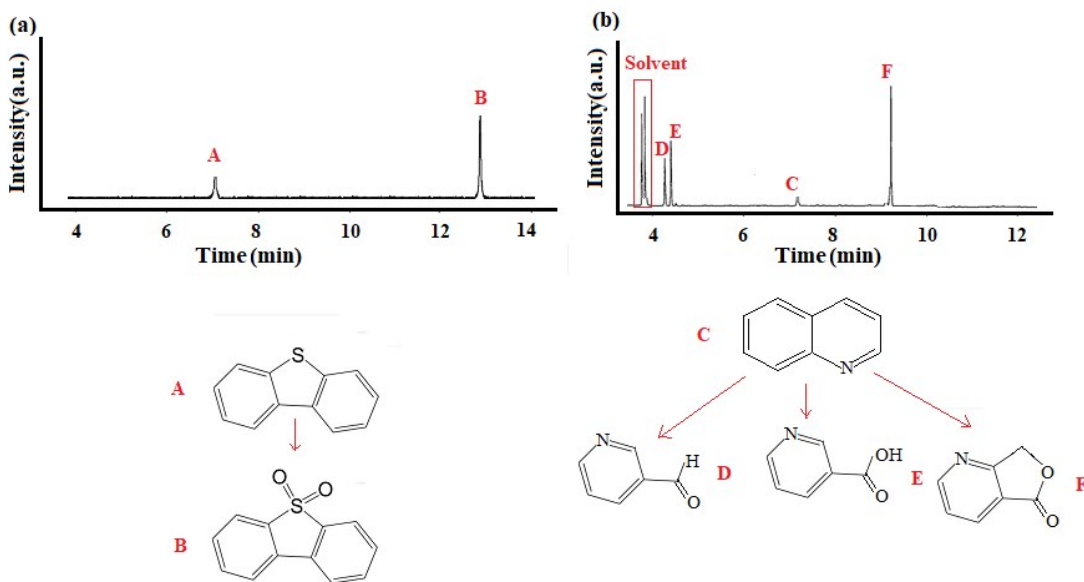

Fig. S6. GC chromatograms after 45 min photo-oxidation of (a) DBT and (b) Qu (b); Chemical structures of A: dibenzothiophene; B: dibenzothiophene sulfone; C: quinolone; D: nicotinaldehyde; E: nicotinic acid; F: 7-methyl furo [3,4-b]pyridin- 5(7H)-one

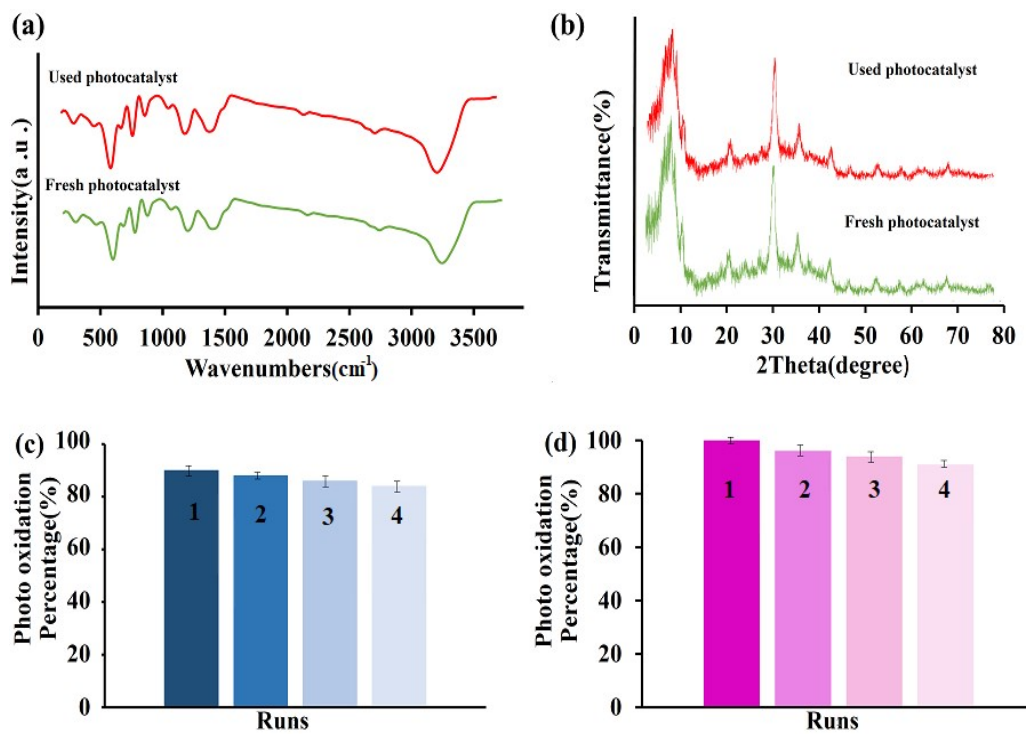

Fig. S7. (a) FTIR spectra and (b) XRD patterns of the fresh and recycled photocatalysts; Photocatalytic efficiency for (c) DBT and (d) Qu after four consecutive cycles.
